# Supplementary material for: Electrochemical behavior of lactate dehydrogenase immobilized on “silica sol–gel/nanometre-sized tridecameric aluminium polycation” modified gold electrode and its application
Source: Royal Society of Chemistry journal article supplement (doi:10.1039/b823096j), 2009-01-01
Supplement: b823096j.pdf [file b823096j.pdf]

## Electrochemical behavior of lactate dehydrogenase immobilized on “silica sol-gel/nanometer-sized tridecameric aluminium polycation” modified gold electrode and its application

Jiongjia Cheng, Deqian Huang, Jing Zhang, Wenjing Yang, Na Wang, Yongbo Sun, Keyu Wang, Xiangyin Mo and Shuping Bi\*

TABLE 1. Different nano-size distributions of K-Al<sub>13</sub> for different groups

| Groups                                                                      | Preparation method                                                                                                                                                                                                                                                                                                      | Particle size distribution of single K-Al <sub>13</sub> polymer and its aggregates                                                                                                                             |
|-----------------------------------------------------------------------------|-------------------------------------------------------------------------------------------------------------------------------------------------------------------------------------------------------------------------------------------------------------------------------------------------------------------------|----------------------------------------------------------------------------------------------------------------------------------------------------------------------------------------------------------------|
| This work                                                                   | The hydroxyl polyaluminum (HPA) solution with OH/Al=2.3 is prepared with alkalinity titration method; from this solution, purified K-Al <sub>13</sub> solution is further prepared with SO <sub>4</sub> <sup>2-</sup> /Ba <sup>2+</sup> method.                                                                         | Particle size of K-Al <sub>13</sub> aggregates is 200-500 nm.<br>(Dynamic light scattering (DLS) measurement, Brookhaven BI200SM, USA)                                                                         |
| <i>Single K-Al<sub>13</sub> polymer in HPA solutions</i>                    |                                                                                                                                                                                                                                                                                                                         |                                                                                                                                                                                                                |
| Perry C.C.                                                                  | The HPA solutions with OH/Al=1.5-2.7 are prepared with alkalinity titration method, and then aged 1 h, 3 h and 24 h <sup>[1, 2]</sup> .                                                                                                                                                                                 | Aging 1 h, the particle size is 0.75-1.50 nm;<br>Aging 3 h, the particle size is 0.91-1.46 nm;<br>Aging 24 h, the particle size is 0.75-2.27 nm.<br>(DLS measurement, Coulter N4plus particle size meter, USA) |
| <i>K-Al<sub>13</sub> aggregates in HPA solutions</i>                        |                                                                                                                                                                                                                                                                                                                         |                                                                                                                                                                                                                |
| Qu J.H.                                                                     | The HPA solutions with OH/Al=2.0 and 2.5 are prepared with electrochemical method <sup>[3]</sup> .                                                                                                                                                                                                                      | Particle size of K-Al <sub>13</sub> aggregates in the HPA solution with OH/Al=2.0 is 8-220 nm, and that in the HPA solution with OH/Al=2.5 is 8-425nm.<br>(DLS measurement, Brookhaven BI200SM, USA)           |
|                                                                             | The HPA solutions with OH/Al=2.14 and 2.23 are prepared with electrochemical method <sup>[4]</sup> .                                                                                                                                                                                                                    | Particle size of K-Al <sub>13</sub> aggregates in the HPA with OH/Al=2.14 is 27-526 nm, and that in the HPA with OH/Al=2.23 is 43-288 nm.<br>(DLS measurement, Brookhaven BI200SM, USA)                        |
| <i>K-Al<sub>13</sub> aggregates in purified K-Al<sub>13</sub> solutions</i> |                                                                                                                                                                                                                                                                                                                         |                                                                                                                                                                                                                |
| Gao B.Y.                                                                    | The HPA solution with OH/Al=2.4 is prepared with alkalinity titration method; from this solution, purified K-Al <sub>13</sub> solution is further prepared with SO <sub>4</sub> <sup>2-</sup> /Ba <sup>2+</sup> method, column chromatography method and precipitation with adding ethanol and acetone <sup>[5]</sup> . | The average particle sizes of K-Al <sub>13</sub> aggregates obtained from these three methods are 63, 18 and 42 nm, respectively.<br>(Particle size measurement, Zetasizer-3000 HS <sub>A</sub> , UK)          |
| Chu Y.B.                                                                    | The HPA solution with OH/Al=2.5 is prepared with alkalinity titration method; from this solution, purified K-Al <sub>13</sub> solution is further prepared with column chromatography method <sup>[6]</sup> .                                                                                                           | Particle size of K-Al <sub>13</sub> aggregates is 70-150 nm.<br>(Particle size measurement, Zetasizer-3000 HS <sub>A</sub> , UK)                                                                               |
| Luan Z.K.                                                                   | The HPA solution with OH/Al=2.4 is prepared with alkalinity titration method; from this solution, purified K-Al <sub>13</sub> solution is further prepared by precipitation with adding ethanol and acetone <sup>[7]</sup> .                                                                                            | Particle size of K-Al <sub>13</sub> aggregates is 200 nm-2 μm.<br>(SEM, Hitachi S-520, Japan)                                                                                                                  |

## References

- [1] Shafran K.L., Deschaume O., Perry, C.C. High-temperature speciation studies of Al-ion hydrolysis. *Advanced Engineering Materials*, 2004, 6(10), 836-839.
- [2] Shafran K.L., Perry, C.C. A systematic investigation of aluminum ion speciation at high temperature. Part. 1. Solution studies. *Dalton Transactions*, 2005, 12, 2098-2105.
- [3] Liu H.J., Qu J.H., Zhang S.J., Hu C.Z. Characteristics and formation of  $[\text{AlO}_4\text{Al}_{12}(\text{OH})_{24}(\text{H}_2\text{O})_{12}]^{7+}$  in electrolysis process. *Science in China (Series B)*, 2002, 45(5), 515-520.
- [4] Hu C.Z., Liu H.J., Qu J.H. Preparation and characterization of polyaluminum chloride containing high content of  $\text{Al}_{13}$  and active chlorine. *Colloids and Surfaces A: Physicochem. Eng. Aspects*, 2005, 260, 109-117.
- [5] Gao B.Y., Kong C.Y., Yue Q.Y., Wang X.N., Chu Y.B., Wang S.G. Purification and characterization of  $\text{Al}_{13}$  species in polyaluminum chloride. *Acta Chimica Sinica*, 2005, 63 (18), 1671-1675.
- [6] Chu Y.B., Gao B.Y., Yue Q.Y., Wang Y., Liu Y.Z., Kong C.Y. Purification and characterization of Nano  $\text{Al}_{13}$  species in polyaluminum chloride. *Environmental Science*, 2004, 25 (5), 75-79.
- [7] Zhao H.Z., Luan Z.K., Su Y.B., Wang S.G. Purification and characterization of  $\text{Al}_{13}$  species. *Chemical Journal of Chinese University*, 2002, 23(5), 751-755.
